## **Horizontal gene cluster transfer increased hallucinogenic mushroom diversity**

Hannah T. Reynolds<sup>1,2</sup>  
Vinod Vijayakumar<sup>1</sup>  
Emile Gluck-Thaler<sup>1</sup>  
Hailee Brynn Korotkin<sup>3</sup>  
Patrick Brandon Matheny<sup>3</sup>  
Jason Christopher Slot<sup>1</sup>

<sup>1</sup>Department of Plant Pathology, The Ohio State University

<sup>2</sup>Department of Biological & Environmental Sciences, Western Connecticut State University

<sup>3</sup> Ecology & Evolutionary Biology, University of Tennessee, Knoxville

Corresponding Author: Jason C. Slot, [slot.1@osu.edu](mailto:slot.1@osu.edu)

1 **Abstract:**

2 Secondary metabolites are heterogeneous natural products that often mediate  
3 interactions between species. The tryptophan-derived secondary metabolite,  
4 psilocin, is a serotonin receptor agonist that induces altered states of consciousness.  
5 A phylogenetically disjunct group of mushroom-forming fungi in the Agaricales  
6 produce the psilocin prodrug, psilocybin. Spotty phylogenetic distributions of fungal  
7 compounds are sometimes explained by horizontal transfer of metabolic gene  
8 clusters among unrelated fungi with overlapping niches. We report the discovery of  
9 a psilocybin gene cluster in three hallucinogenic mushroom genomes, and evidence  
10 for its horizontal transfer between fungal lineages. Patterns of gene distribution and  
11 transmission suggest that psilocybin provides a fitness advantage in the dung and  
12 late wood-decay niches, which may be reservoirs of fungal indole-based metabolites  
13 that alter behavior of mycophagous and wood-eating invertebrates. These  
14 hallucinogenic mushroom genomes will serve as models in neurochemical ecology,  
15 advancing the prospecting and synthetic biology of novel neuropharmaceuticals.  
16

16 Secondary metabolites (SMs) are small molecules that are widely employed in  
17 defense, competition, and signaling among organisms (Raguso et al. 2015). Due to  
18 their physiological activities, SMs have been adopted by both ancient and modern  
19 human societies as medical, spiritual, or recreational drugs. Psilocin is a  
20 psychoactive agonist of the serotonin (5-hydroxytryptamine, **5-HT**) -2a receptor  
21 (Halberstadt and Geyer 2011) and is produced as the phosphorylated prodrug  
22 psilocybin by a restricted number of distantly related mushroom forming families of  
23 the Agaricales (Bolbitiaceae, Inocybaceae, Hymenogastraceae, Pluteaceae) (Allen  
24 2010 May 19; Dinis-Oliveira 2017). Hallucinogenic mushrooms have a long history  
25 of religious use, particularly in Mesoamerica, and were a catalyst of cultural  
26 revolution in the West in the mid 20th century (Nyberg 1992; Letcher 2006).  
27 Psilocybin was structurally described and synthesized in 1958 by Albert Hoffman  
28 (Hofmann et al. 1958), and a biosynthetic pathway (Fig. 1B) was later proposed  
29 based on the transformation of precursor molecules by *Psilocybe cubensis* (Agurell  
30 and Nilsson 1968). However, prohibition since the 1970s (21 U.S. Code § 812 -  
31 Schedules of controlled substances) has limited advances in psilocybin genetics,  
32 ecology, and evolution. There has been a recent resurgence of the hallucinogen  
33 research in the clinical setting. Brain state imaging studies of psilocin exposure have  
34 identified changes in neural activity and interconnectivity that underlie subjective  
35 experiences, and therapeutic trials have investigated psilocybin's potential for  
36 treating major depression and addictive disorders (Griffiths et al. 2011; Carhart-  
37 Harris et al. 2012; Petri et al. 2014; Carhart-Harris et al. 2016; Johnson et al. 2017).  
38 While the ecological roles of psilocybin, like most SMs, remain unknown, psilocin's  
39 mechanism of action suggests metazoans may be its principal targets.

40

41 A common feature of fungal SM biosynthesis is the organization of most or all  
42 required anabolic, transport, and regulatory elements in gene clusters (GCs). GCs  
43 are often discontinuously distributed among fungal taxa, partly due to horizontal  
44 transfer (HT) among species with overlapping ecological niches (Gluck-Thaler and  
45 Slot 2015). The sparse phylogenetic distribution of psilocybin, coupled with the  
46 requirement for multiple enzymatic steps for its biosynthesis (tryptophan-

47 decarboxylation, N-methylation, indole-4-hydroxylation, and O-phosphorylation),  
48 suggest the psilocybin pathway might have dispersed via horizontal GC transfer, and  
49 therefore the genetic mechanism for psilocybin biosynthesis might be identified in  
50 searches for GCs with a common phylogenetic history and distribution among  
51 psilocybin producing (PS+) mushrooms. The pattern of HT events may further  
52 suggest ecological pressures that have driven the pathway's persistence (Baquero  
53 2004).

54

55 We identified candidate psilocybin genes by sequencing three diverse PS+  
56 mushroom monokaryon genomes -- *Psilocybe cyanescens*, *Panaeolus (=Copelandia)*  
57 *cyanescens*, and *Gymnopilus dilepis* (Table 1), and comparing them to three related  
58 mushrooms not known to produce psilocybin (PS-): *Galerina marginata*, *Agaricales*  
59 *sp.* 9 ; and *Hypholoma sublateritium*. Of 37 gene homolog groups (HGs)  
60 consistent with a PS+ distribution among these taxa, only five were clustered, all in  
61 PS+ genomes (Fig. S1-pipeline and HGs). We retroactively designated *Gy.*  
62 *chrysopellus*, potentially PS+ because it possesses a cluster identical to *Gy. dilepis*,  
63 which is not a surprising oversight given inconsistent identifications, and  
64 geographical variation among *Gymnopilus* spp. phenotypes. Predicted functions of  
65 these five genes were also consistent with psilocybin biosynthesis and metabolite  
66 transport, and were putatively designated tryptophan decarboxylase (TDC),  
67 tryptamine N-methyltransferase (TMT), dimethyltryptamine-4-hydroxylase (D4H),  
68 psilocin phosphotransferase (PPT), and psilocybin transporter (PST). As SM GCs are  
69 infrequently identified in Basidiomycota compared with Ascomycota, this is a  
70 notable discovery (Quin et al. 2014).

71

72 To confirm GC function, we profiled the enzymology of heterologously expressed  
73 TDC and PPT, and assayed by LC-MS/MS analyses. We determined that TDC, the first  
74 committed step in the reaction and the only one not producing a drug-scheduled  
75 compound, has specific decarboxylase activity on tryptophan. TDC reactions  
76 produced tryptamine, identified at the characteristic  $m/z$  144.1 [M+H]<sup>+</sup>, (Fig. S2,  
77 Supplemental data1). TDC did not decarboxylate phenylalanine, tyrosine or 5-

78 hydroxy-L-tryptophan (5-HTP) under the same conditions. We note that TDC is  
79 similar to type II phosphatidylserine decarboxylases (PSDs), but has no significant  
80 sequence similarity with a pyridoxal-5'-phosphate-dependent decarboxylase  
81 recently characterized in *Ceriporiopsis subvermispota* as specific for L-tryptophan  
82 and 5-HTP (Kalb et al. 2016). A unique GGSS sequence in a conserved C-terminal  
83 motif (Fig. S3), suggests tryptophan decarboxylation is a previously unknown  
84 derived function among PSDs (Wriessnegger et al. 2009; Choi et al. 2015). We  
85 detected no activity of PPT on 5-HT or 4-Hydroxyindole (4-HI) as alternatives to the  
86 psilocin substrate, possibly due to requirements for the 4-hydroxyl and the  
87 methylated amine groups of psilocin, but further characterization of PPT and other  
88 enzymes was prevented by the regulatory status of substrates and products.

89  
90 Phylogenetic analyses of PS homologs from a local database of 618 fungal  
91 proteomes yielded congruent gene tree topologies with respect to PS<sup>+</sup> taxa, and  
92 clades of clustered PS genes from all gene trees excluded the PS<sup>-</sup> taxa in the  
93 database, suggesting the clustered genes are coordinately-inherited (Fig. 1, Fig. S4  
94 A-F). The gene trees also suggest HT of the cluster from *Psilocybe* to *Panaeolus* and  
95 HT of most PS genes between Atheliaceae and Agaricaceae when compared to a  
96 phylogenomic tree of related Agaricales (Fig. 1). The direction of the latter HT is  
97 ambiguous, and not strongly supported by all five genes. Analyses with TDC and PPT  
98 amplicon sequences retrieved by degenerate PCR of unsequenced *Psilocybe* and  
99 *Conocybe* genomes (Supplemental data1) suggest the dung fungus *Ps. cubensis*  
100 vertically inherited the cluster, and *Pa. cyanescens* acquired the cluster from  
101 *Psilocybe* sp., and possibly from a dung-associated lineage. Alternative hypotheses of  
102 vertical inheritance in these lineages were rejected; exclusion of *Pa. cyanescens* and  
103 *C. cyanopus* (AU test,  $p = 0.004$ ) or *Pa. cyanescens* alone ( $p = 0.036$ ) were  
104 significantly worse constrained topologies (Supplemental data1). Furthermore, a  
105 TDC gene tree-species tree reconciliation model allowing duplication, HT, and loss  
106 (6 events: D=1, HT=3, L=2) is more parsimonious than a model that only allows  
107 duplication and loss (28 events: D=3, L=25)(Fig. S5). PS gene orthologs were not  
108 detected in *Ps. fuscofulva*, a PS<sup>-</sup> species representing an early branch in *Psilocybe*

109 diversification (Borovička et al. 2015). Conservation of synteny flanking the *Ps.*  
110 *cyanescens* PS cluster (Fig. 1) suggests it may have been recently acquired in  
111 *Psilocybe* as well, or lost as a unit in close relatives. A genome wide scan did not  
112 identify additional HT genes or clusters between *Psilocybe* and *Panaeolus* (Fig. S6).  
113 HT is comparatively rare in the Basidiomycetes, suggesting the transfer of the PS  
114 cluster may have special significance (Wisecaver et al. 2014), and is to our  
115 knowledge, the first report of HT of a SM GC between lineages of mushroom-forming  
116 fungi (Agaricomycotina).

117  
118 Recent studies suggest that ecology can select for both genome content (Ma et al.  
119 2010; de Jonge et al. 2013) and organization in eukaryotes through both vertical and  
120 horizontal patterns of inheritance (Holliday et al. 2015; Kakioka et al. 2015).  
121 Ordination of 10,998 HGs identified two principal components (PCs) that describe  
122 22% of the variation in gene content among 16 Agaricales genomes (Fig. 2B).  
123 Discrimination of genome composition along PC1 appears to reflect phylogenetic  
124 differences, while discrimination along PC2 parallels ecological differences between  
125 plant mutualists and other fungi. However, PC2 does not discriminate between dung  
126 and wood-decay fungi. The functions of HGs most associated with each PC are  
127 consistent with this interpretation. All eight metabolism-related processes in the  
128 COG classification system are overrepresented in PC2, but only one is  
129 overrepresented in PC1 HGs (Supplemental data1). The grouping of several  
130 divergent lineages of wood and dung decay fungi to the exclusion of close  
131 ectomycorrhizal relatives along PC2 may reflect similar selective pressures in the  
132 decayed wood and dung environments, from recalcitrant plant polymers like lignin,  
133 and invertebrate predation (Rouland-Lefèvre 2000). However, a small number of  
134 HGs exclusive to either wood or dung associated fungi (Fig. S7, Supplemental data1)  
135 are consistent with ecological specialization within each guild. Wood-specific genes  
136 include functions in lignin degradation (e.g., peroxidase, isoamyl alcohol oxidase)  
137 and carbohydrate transport, while dung-specific genes have functions in bacterial  
138 cell wall degradation (e.g., lysozyme), hemicellulose degradation (e.g., Endo-1,4-  
139 beta-xylanase, Alpha-L-arabinofuranosidase), and inorganic phosphate transport.

140 Niche-specific genes are largely consistent with vertical inheritance; however,  
141 analyses support HT of a single ferric-reductase-like gene (pfam01794, pfam00175)  
142 likely involved in iron uptake, to *Coprinopsis* and *Panaeolus* from dung-associated  
143 Ascomycota (Supplemental data).

144

145 In addition to similar ecological pressures, similar genome content among wood and  
146 dung-decaying fungi may also reflect the ecological diversification of  
147 Agaricomycetes that accompanied major geological transformations (Fig. 2B). For  
148 example, the emergence of true wood opened a massive saprotrophy niche space in  
149 the upper Devonian (380 Mya), in which the Agaricomycetes diversified with the aid  
150 of key enzymatic innovations (Floudas et al. 2012). The subsequent radiation of  
151 herbivorous megafauna during the Eocene approximately 50 MYA (MacFadden  
152 2000) and the spread of grasslands 40 MYA (Retallack 2001) expanded the  
153 mammalian dung niche space in which invertebrates and fungi competed. These  
154 changes parallel the repeated emergence of dung-specialization from plant-decay  
155 ancestors in the radiation of *Psilocybe* and other Agaricales lineages (Ramirez-Cruz  
156 et al. 2013; Tóth et al. 2013). Late stage wood decay fungi like *Psilocybe* spp. likely  
157 harbor genetic exaptations for lignin tolerance/degradation, and competition with  
158 invertebrates and prokaryotes, and acquisition of particularly adaptive functions by  
159 other fungi (e.g. *Panaeolus*) through HT may have facilitated additional transitions  
160 to dung saprotrophy.

161

162 The evolution of PS genes suggest they originally served roles in the wood-decay  
163 niche, and more recently emerged through both vertical and horizontal transfer in  
164 dung-decay fungi (Fig. 2). HT and retention of PS clusters are evidence of selection  
165 on the PS pathway in the recipient lineage, as SM clusters are inherently unstable in  
166 fungal genomes (Reynolds et al. 2017 Apr 28). Psilocybin neurological activity,  
167 coupled with HT and retention in lineages that colonize dung and/or decayed wood,  
168 which are rich in both mycophagous and competitor invertebrates (Rouland-Lefevre  
169 2000), suggest that psilocybin may be a modulator of insect behavior. Psilocybin  
170 and/or the related aeruginascin have also been identified in the lichenized agaric,

171 *Dictyonema huaorani*, and in the ectomycorrhizal genus *Inocybe* (Kosentka et al.  
172 2013; Schmull et al. 2014). PS distribution in *Inocybe* is complementary to that of  
173 the acetylcholine mimic, muscarine, which could suggest alternative strategies and  
174 pressures to manipulate animal behavior beyond the dung and wood decay niches.  
175 Neurotransmitter mimics may provide advantages to fungi by interfering with the  
176 behavior of invertebrate competitors for woody resources (Hunt et al. 2007),  
177 especially social insects, like termites, which emerged ~ 137 Mya, because they rely  
178 on the coordinated activities of multiple castes (Genise 2017). It is thus intriguing  
179 that D4H and PST have experienced massive gene family expansion through  
180 duplication in *Fibulorhizoctonia* sp., which produce termite egg-mimicking sclerotia  
181 in an ancient mutualistic relationship with *Reticulitermes* termites (Matsuura 2005).  
182 While neurotransmitter agonists are not known to mediate this symbiosis, insect  
183 predatory fungi (i.e. *Cordyceps* spp.) use neurotransmitter analogs to influence the  
184 behavior of infected insects (de Bekker et al. 2014), and a number of repellents and  
185 toxins in wood-decay fungi inhibit xylophagy and mycophagy by termites (Rouland-  
186 Lefèvre 2000).

187  
188 The identification of genes underlying PS biosynthesis is an important advance in  
189 the field of neurochemical ecology, with both social and medical applications. The  
190 sequences of the first *Psilocybe* and *Panaeolus* genomes presented here will be  
191 important resources for the prospecting of novel neurotropic natural products  
192 (Rutledge and Challis 2015). The discovery that a psilocybin cluster has been  
193 horizontally transferred and subsequently maintained among the invertebrate-  
194 challenged environments of dung and late wood-decay suggests these niches may be  
195 reservoirs not only of new antibiotics (Bills et al. 2013 Aug 23), but also novel  
196 neuroactive pharmaceuticals.

197

## 198 **Acknowledgements:**

199 The authors thank Jan Borovička and Paul Stamets for providing additional cultures  
200 used in this study. We also thank Michael Kelly, Ma Elena Hernandez, Stephen Opiyo,



201 and Tea Meulia, OARDC Molecular and Cellular Imaging Center for technical  
202 support. Computation was performed using The Ohio Supercomputer Center  
203 resources. Genome assemblies are deposited in GenBank under accessions  
204 SAMN07166449, SAMN07169033, and SAMN07169108.  
205

206 **Table 1.** Genome assembly and annotation of psilocybin-producing mushrooms.

|                                              | length (nt) | scaffolds | contigs | av. depth of coverage (x) | N50 (nt) | Complete BUSCOs (%) | total proteins | decarboxylases / PSD <sup>a</sup> | P450's <sup>a</sup> | methyltransferases / DUF890 domain-proteins <sup>a</sup> | kinases / phosphotransferases / OG term 0PNAW <sup>a</sup> | MFS <sup>a</sup> |
|----------------------------------------------|-------------|-----------|---------|---------------------------|----------|---------------------|----------------|-----------------------------------|---------------------|----------------------------------------------------------|------------------------------------------------------------|------------------|
| <i>G. dilepis</i> <sup>b</sup><br>TENN071165 | 47,177,497  | 8,423     | 10,681  | 16.5                      | 33,540   | 73.43               | 16,257         | 28 / 9                            | 151                 | 89 / 4                                                   | 275 / 29 / 1                                               | 37               |
| <i>Pa. cyanescens</i>                        | 44,965,162  | 9,521     | 11,850  | 25.7                      | 32,751   | 75.66               | 13,420         | 28 / 8                            | 148                 | 91 / 2                                                   | 267 / 16 / 2                                               | 34               |
| <i>Ps. cyanescens</i>                        | 53,483,841  | 18,721    | 38,006  | 44.7                      | 46,250   | 72.18               | 15,973         | 38 / 17                           | 178                 | 102 / 2                                                  | 298 / 23 / 1                                               | 44               |

207  
208  
209  
210  
211

<sup>a</sup>Functional category of PS genes as annotated in EggNog. <sup>b</sup>*G. dilepis* (= *G. aeruginosus* sensu L.R. Hesler) was isolated from oak sawdust in Knoxville, Tennessee 4-Oct-2013. *Pa. cyanescens* and *Ps. cyanescens* basidiospores were supplied by The Spore Works, Knoxville.

212 **Figure Legends:**

213 **Figure 1.** Psilocybin evolution. A. The PS cluster consists of tryptophan  
214 decarboxylase (TDC), 1-2 P450 monooxygenases (D4H), methyltransferase (TMT),  
215 phosphotransferase (PPT), and 1-2 MFS transporters (PST). B. Phylogenomic tree of  
216 Agaricales (tan) with Atheliales (blue) outgroup. Support values = (internode  
217 certainty, tree certainty). Clades 1-5 are as in Fig. 2B. C. PS locus synteny relative to  
218 *Ps. cyanescens* scaffold 5617 and *G. marginata* scaffold 9. D. RAxML phylogeny of  
219 TDC indicating putative HT branches; *Eutypa lata* is in Xylariales (Ascomycota,  
220 lavender), an order correlated with absence of termites in coarse woody debris  
221 (Kirker et al. 2012), with members that produce a white rot of wood. . . . .  
222 Entomophthoromycotina sp. 1, rose) is commonly associated with amphibian dung  
223 and arthropods. Grey taxon names = PCR sequences, black = whole genome.  
224 Support is percent of 100 ML bootstraps. \*\*54 similar D4H homologs not shown.

225  
226 **Figure 2.** Patterns of ecological diversification of PS genes and Agaricales genomes.  
227 A. Ultrametric representation of PPT phylogeny, with root age hypothetically set to  
228 align ecological transitions with Earth history events. HT = horizontal transfer, VT =  
229 vertical transmission. B. Ordination of Agaricales genome content. Numerals  
230 correspond to clades in Fig. 1A.

231

231 **References Cited:**

- 232 Agurell S, Nilsson JL. 1968. Biosynthesis of psilocybin. II. Incorporation of labelled  
233 tryptamine derivatives. *Acta Chem Scand* 22:1210–1218.
- 234 Allen JW. 2010. A Chemical Referral and Reference Guide to the Known Species of  
235 Psilocin and/or Psilocybin-containing Mushrooms and their Published  
236 Analysis and Bluing Reactions.
- 237 Baquero F. 2004. From pieces to patterns: evolutionary engineering in bacterial  
238 pathogens. *Nat Rev Micro* 2:510–518.
- 239 Bills GF, Gloer JB, An Z. 2013 Aug 23. Coprophilous fungi: antibiotic discovery and  
240 functions in an underexplored arena of microbial defensive mutualism. *Curr.*  
241 *Opin. Microbiol.*
- 242 Borovička J, Oborník M, Stříbrný J, Noordeloos ME, Sánchez LAP, Gryndler M. 2015.  
243 Phylogenetic and chemical studies in the potential psychotropic species  
244 complex of *Psilocybe atrobrunnea* with taxonomic and nomenclatural notes.  
245 *Persoonia* 34:1–9.
- 246 Carhart-Harris RL, Bolstridge M, Rucker J, Day CMJ, Erritzoe D, Kaelen M, Bloomfield  
247 M, Rickard JA, Forbes B, Feilding A, et al. 2016. Psilocybin with psychological  
248 support for treatment-resistant depression: an open-label feasibility study.  
249 *Lancet Psychiatry* 3:619–627.
- 250 Carhart-Harris RL, Erritzoe D, Williams T, Stone JM, Reed LJ, Colasanti A, Tyacke RJ,  
251 Leech R, Malizia AL, Murphy K, et al. 2012. Neural correlates of the psychedelic  
252 state as determined by fMRI studies with psilocybin. *Proceedings of the*  
253 *National Academy of Sciences* 109:2138–2143.
- 254 Choi J-Y, Duraisingh MT, Marti M, Ben Mamoun C, Voelker DR. 2015. From Protease  
255 to Decarboxylase. *Journal of Biological Chemistry* 290:10972–10980.
- 256 de Bekker C, Quevillon LE, Smith PB, Fleming KR, Ghosh D, Patterson AD, Hughes DP.  
257 2014. Species-specific ant brain manipulation by a specialized fungal parasite.  
258 *BMC Evol Biol* 14:185.
- 259 de Jonge R, Bolton MD, Kombrink A, van den Berg GCM, Yadeta KA, Thomma BPHJ.  
260 2013. Extensive chromosomal reshuffling drives evolution of virulence in an  
261 asexual pathogen. *Genome Res* 23:1271–1282.
- 262 Dinis-Oliveira RJ. 2017. Metabolism of psilocybin and psilocin: clinical and forensic  
263 toxicological relevance. *Drug Metab. Rev.* 49:84–91.
- 264 Floudas D, Binder M, Riley R, Barry K, Blanchette RA, Henrissat B, Martínez AT,  
265 Otilar R, Spatafora JW, Yadav JS, et al. 2012. The Paleozoic origin of enzymatic  
266 lignin decomposition reconstructed from 31 fungal genomes. *Science*

- 267 336:1715–1719.
- 268 Genise JF. 2017. The Trace Fossil Record of Eusociality in Ants and Termites.  
269 *Ichnoentomology*.
- 270 Gluck-Thaler E, Slot JC. 2015. Dimensions of Horizontal Gene Transfer in Eukaryotic  
271 Microbial Pathogens. *PLoS Pathog* 11:e1005156.
- 272 Griffiths RR, Johnson MW, Richards WA, Richards BD, McCann U, Jesse R. 2011.  
273 Psilocybin occasioned mystical-type experiences: immediate and persisting  
274 dose-related effects. *Psychopharmacology (Berl.)* 218:649–665.
- 275 Halberstadt AL, Geyer MA. 2011. Multiple receptors contribute to the behavioral  
276 effects of indoleamine hallucinogens. *Neuropharmacology* 61:364–381.
- 277 Hofmann A, Frey A, Ott H, Petr Zilka T, Troxler F. 1958. [Elucidation of the structure  
278 and the synthesis of psilocybin]. *Experientia* 14:397–399.
- 279 Holliday JA, Zhou L, Bawa R, Zhang M, Oubida RW. 2015. Evidence for extensive  
280 parallelism but divergent genomic architecture of adaptation along altitudinal  
281 and latitudinal gradients in *Populus trichocarpa*. *New Phytologist* 209:1240–  
282 1251.
- 283 Hunt T, Bergsten J, Levkanicova Z, Papadopoulou A, John OS, Wild R, Hammond PM,  
284 Ahrens D, Balke M, Caterino MS, et al. 2007. A Comprehensive Phylogeny of  
285 Beetles Reveals the Evolutionary Origins of a Superradiation. *Science*  
286 318:1913–1916.
- 287 Johnson MW, Garcia-Romeu A, Griffiths RR. 2017. Long-term follow-up of  
288 psilocybin-facilitated smoking cessation. *Am J Drug Alcohol Abuse* 43:55–60.
- 289 Kakioka R, Kokita T, Kumada H, Watanabe K, Okuda N. 2015. Genomic architecture  
290 of habitat-related divergence and signature of directional selection in the body  
291 shapes of Gnathopogonfishes. *Mol Ecol* 24:4159–4174.
- 292 Kalb D, Gressler J, Hoffmeister D. 2016. Active-Site Engineering Expands the  
293 Substrate Profile of the Basidiomycete L-Tryptophan Decarboxylase CstDC.  
294 *ChemBioChem* 17:132–136.
- 295 Kirker GT, Wagner TL, Diehl SV. 2012. Relationship between wood-inhabiting fungi  
296 and *Reticulitermes* spp. in four forest habitats of northeastern Mississippi.  
297 *International Biodeterioration & Biodegradation* 72: 18-25.
- 298 Kosentka P, Sprague SL, Ryberg M, Gartz J, May AL. 2013. Evolution of the toxins  
299 muscarine and psilocybin in a family of mushroom-forming fungi. *PLoS ONE*.  
300 DOI:10.1371/journal.pone.0064646

- 301 Letcher A. 2006. *Shroom: a cultural history of the magic mushroom*. London: Faber  
302 and Faber.
- 303 Ma L-J, van der Does HC, Borkovich KA, Coleman JJ, Daboussi M-J, Di Pietro A,  
304 Dufresne M, Freitag M, Grabherr M, Henrissat B, et al. 2010. Comparative  
305 genomics reveals mobile pathogenicity chromosomes in *Fusarium*. *Nature*  
306 464:367–373.
- 307 MacFadden BJ. 2000. Cenozoic Mammalian Herbivores From the Americas:  
308 Reconstructing Ancient Diets and Terrestrial Communities. *Annu. Rev. Ecol.*  
309 *Syst.* 31:33–59.
- 310 Matsuura K. 2005. Distribution of termite egg-mimicking fungi (“termite balls”) in  
311 *Reticulitermes* spp. (Isoptera : Rhinotermitidae) nests in Japan and the United  
312 States. *Applied Entomology and Zoology* 40:53–61.
- 313 Nyberg H. 1992. Religious use of hallucinogenic fungi: A comparison between  
314 Siberian and Mesoamerican Cultures. *Karstenia* 32:71-80.
- 315 Petri G, Expert P, Turkheimer F, Carhart-Harris R, Nutt D, Hellyer PJ, Vaccarino F.  
316 2014. Homological scaffolds of brain functional networks. *Journal of The Royal*  
317 *Society Interface* 11:20140873.
- 318 Quin MB, Flynn CM, Schmidt-Dannert C. 2014. Traversing the fungal terpenome. *Nat*  
319 *Prod Rep* 31:1449–1473.
- 320 Raguso RA, Agrawal AA, Douglas AE, Jander G. 2015. The raison d’être of chemical  
321 ecology. *Ecology* 96:617-630.
- 322 Ramirez-Cruz V, Guzman G, Rosa Villalobos-Arambula A, Rodriguez A, Matheny PB,  
323 Sanchez-Garcia M, Guzmán-Dávalos L. 2013. Phylogenetic inference and trait  
324 evolution of the psychedelic mushroom genus *Psilocybe* sensu lato  
325 (Agaricales). *Botany-Botanique* 91:573–591.
- 326 Retallack GJ. 2001. Cenozoic Expansion of Grasslands and Climatic Cooling. *The*  
327 *Journal of Geology* 109:407–426.
- 328 Reynolds H, Slot JC, Divon HH, Lysøe E, Proctor RH, Brown DW. 2017 Apr 28.  
329 Differential retention of gene functions in a secondary metabolite cluster. *Mol*  
330 *Biol Evol.* DOI: 10.1093/molbev/msx145
- 331 Rouland-Lefèvre C. 2000. Symbiosis With Fungi. In: *Termites: evolution*. Dordrecht:  
332 Springer Netherlands. pp. 289–306; 18 p.
- 333 Rutledge PJ, Challis GL. 2015. Discovery of microbial natural products by activation  
334 of silent biosynthetic gene clusters. *Nat Rev Micro* 13:509–523.

- 335 Schmull M, Dal-Forno M, Lücking R, Cao S, Clardy J, Lawrey JD. 2014. *Dictyonema*  
336 *huaorani* (Agaricales: Hygrophoraceae), a new lichenized basidiomycete from  
337 Amazonian Ecuador with presumed hallucinogenic properties. *The Bryologist*  
338 117:386–394.
- 339 Tóth A, Hausknecht A, Krisai-Greilhuber I, Papp T, Vágvölgyi C, Nagy LG. 2013.  
340 Iteratively refined guide trees help improving alignment and phylogenetic  
341 inference in the mushroom family Bolbitiaceae. *PLoS ONE* 8:e56143.
- 342 Wisecaver JH, Slot JC, Rokas A. 2014. The evolution of fungal metabolic pathways.  
343 *PLoS Genet* 10:e1004816.
- 344 Wriessnegger T, Sunga AJ, Cregg JM, Daum G. 2009. Identification of  
345 phosphatidylserine decarboxylases 1 and 2 from *Pichia pastoris*. *FEMS Yeast*  
346 *Res* 9:911–922.

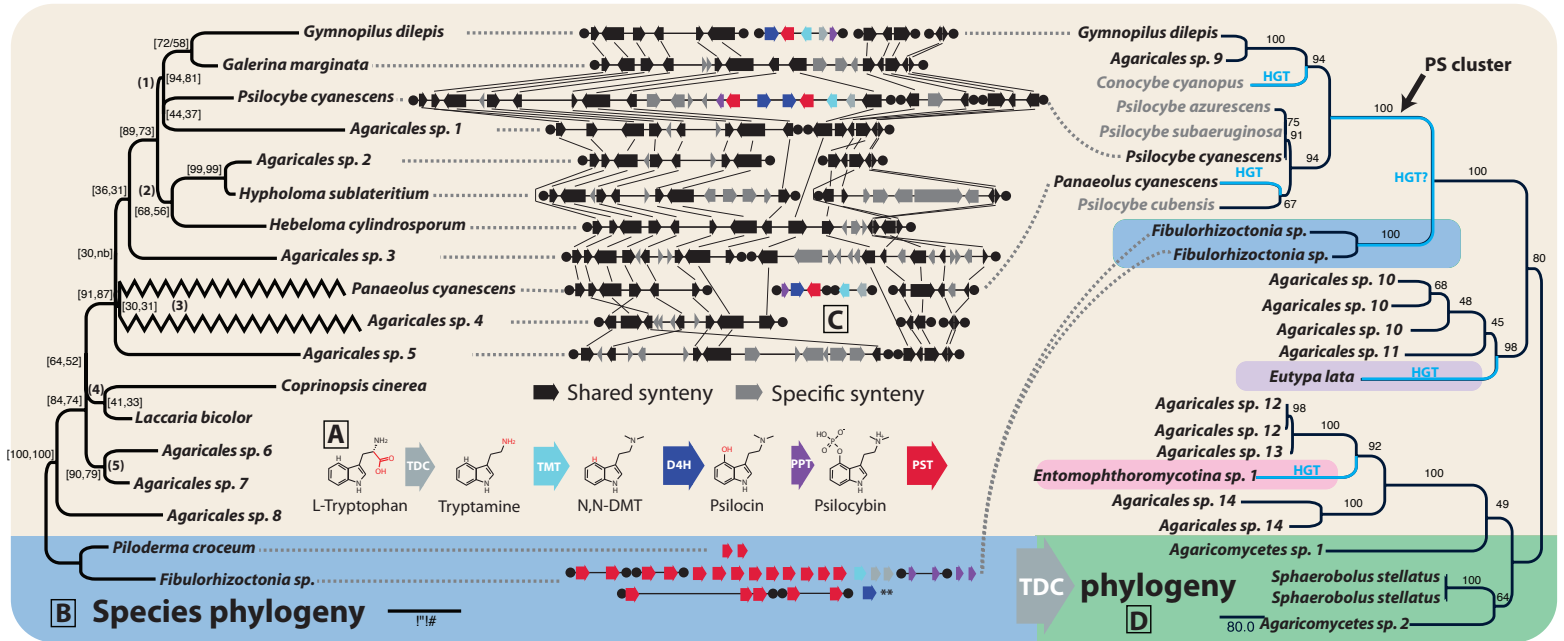



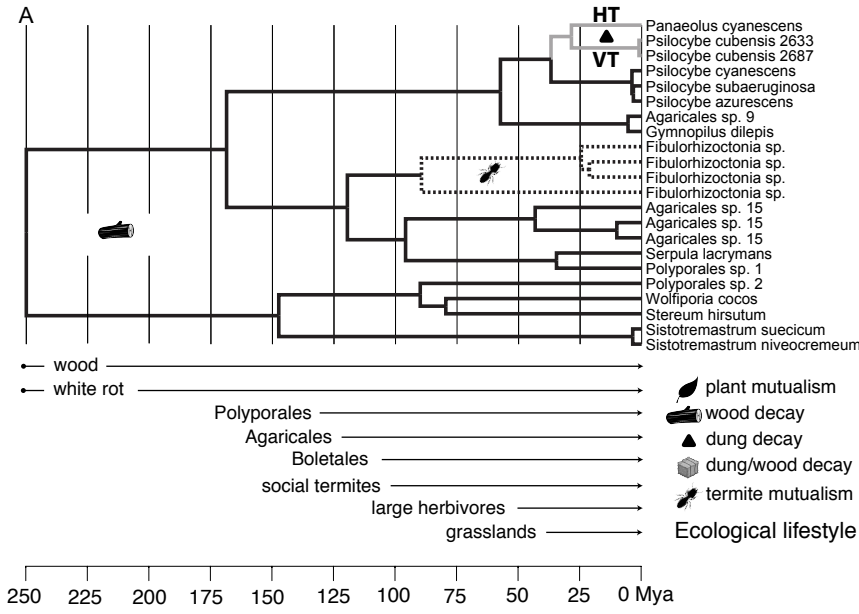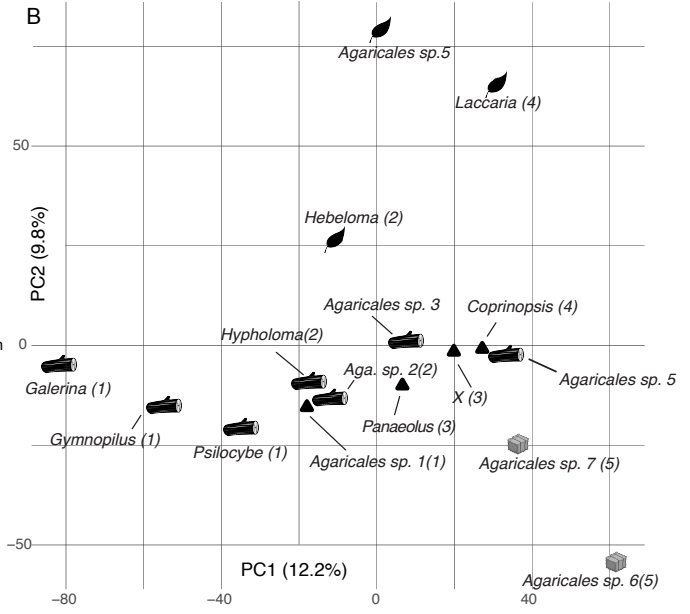

Source: https://www.biorxiv.org/content/biorxiv/early/2017/08/16/176347.full.pdf
